# Supplementary material for: Synthesis of catalysts with fine platinum particles supported by high-surface-area activated carbons and optimization of their catalytic activities for polymer electrolyte fuel cells
Source: Royal Society of Chemistry journal article supplement (doi:10.1039/d1ra02156g), 2021-01-01
Supplement: d1ra02156g1.pdf [file d1ra02156g1.pdf]

## Supplementary Materials

### **Synthesis of catalysts with fine platinum particles supported by high-surface-area activated carbons and optimization of their catalytic activities for polymer electrolyte fuel cells**

Md. Mijanur Rahman,<sup>\*ab</sup> Kenta Inaba,<sup>b</sup> Garavdorj Batnyagt,<sup>b</sup> Masato Saikawa,<sup>b</sup> Yoshiki Kato,<sup>b</sup> Rina Awata,<sup>b</sup> Byambasuren Delgertsetsega,<sup>ab</sup> Yasuo Kaneta,<sup>c</sup> Kotaro Higashi,<sup>de</sup> Tomoya Uruga,<sup>de</sup> Yasuhiro Iwasawa,<sup>de</sup> Koichi Ui,<sup>ab</sup> Tatsuya Takeguchi,<sup>\*ab</sup>

<sup>a</sup>Faculty of Science and Engineering, Iwate University, 4-3-5 Ueda, Morioka, Iwate 020-8551, Japan.

<sup>b</sup>Graduate School of Arts and Sciences, Iwate University, 4-3-5 Ueda, Morioka, Iwate 020-8551, Japan.

<sup>c</sup>JUKES Inc., 32-18-2 Osanai-cho, Kuji, Iwate 028-0041, Japan.

<sup>d</sup>Innovation Research Center for Fuel Cells, University of Electro-Communications, 1-5-1 Chofugaoka, Chofu, Tokyo 182-8585, Japan.

<sup>e</sup>JASRI/SPring-8, 1-1-1, Kouto, Sayo-cho, Sayo-gun, Hyogo 679-5198, Japan

\*Corresponding authors:

Md. Mijanur Rahman, Tel/Fax: +81-019-621-6329,

E-mail: mijanur@iwate-u.ac.jp

Tatsuya Takeguchi, Tel/Fax: +81-019-621-6335,

E-mail: takeguch@iwate-u.ac.jp

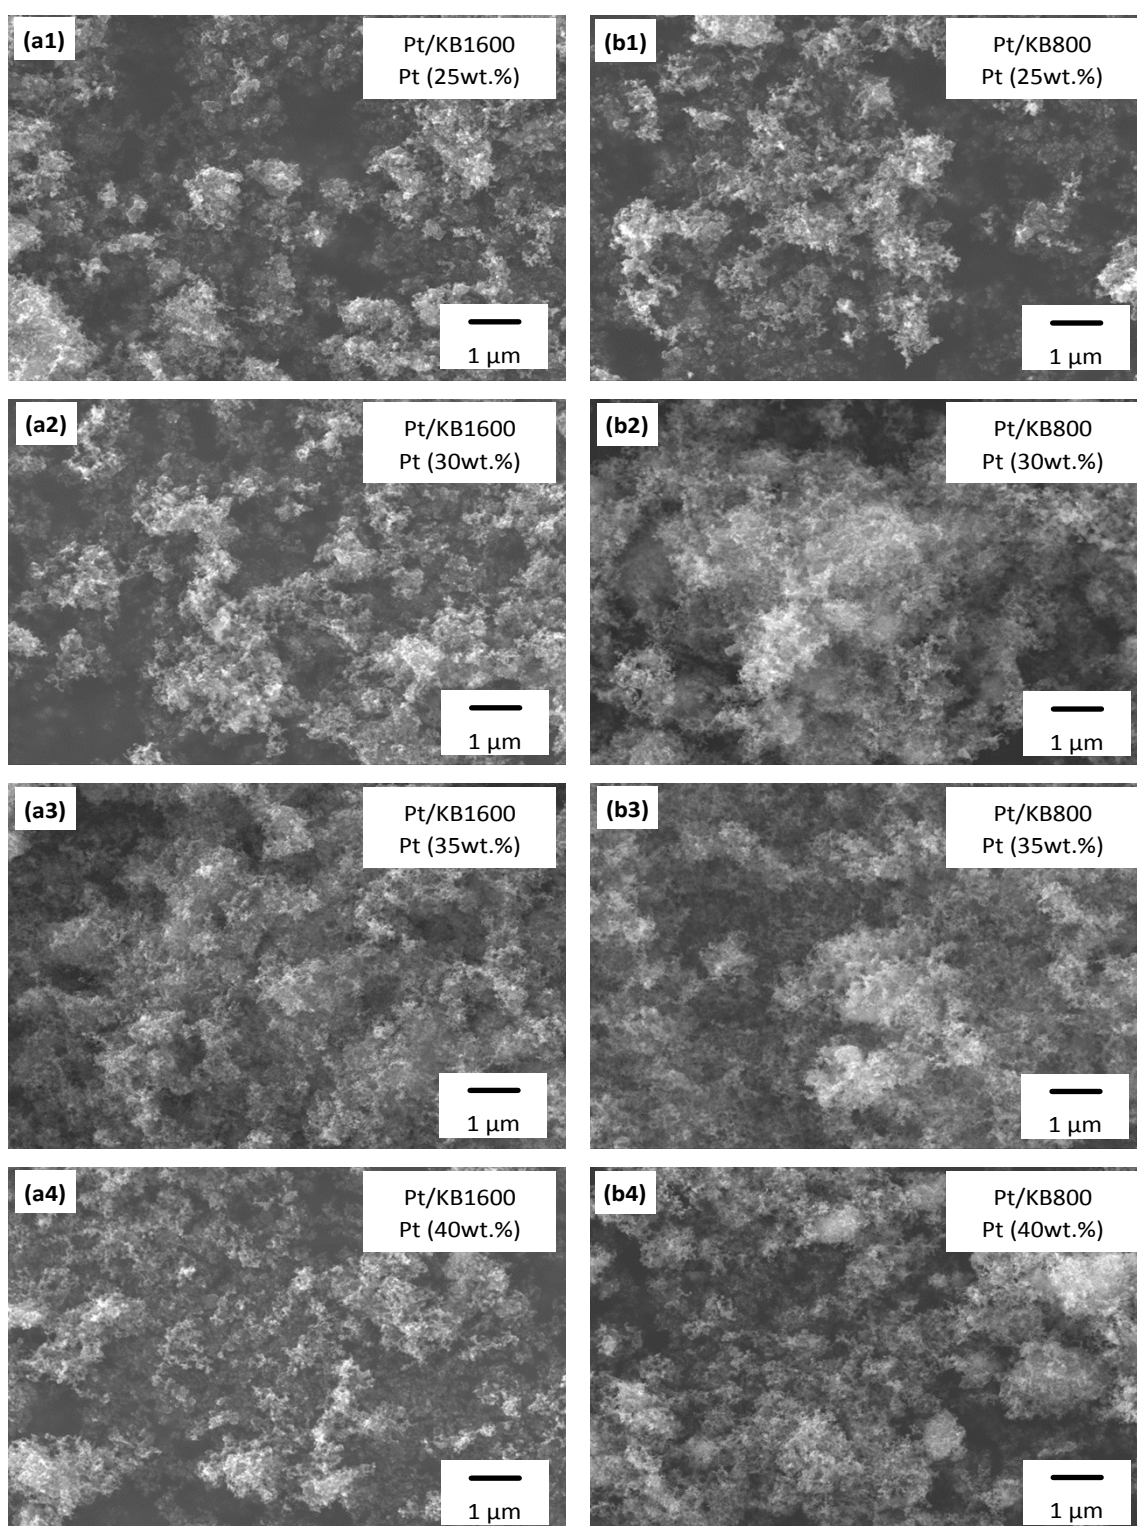

**Fig. S1** SEM images of the Pt/KB1600 and Pt/KB800 catalyst with different Pt loading of (a1 - a4) 25 - 40 wt.%, and (b1 - b4) 25 - 40 wt.%, respectively.

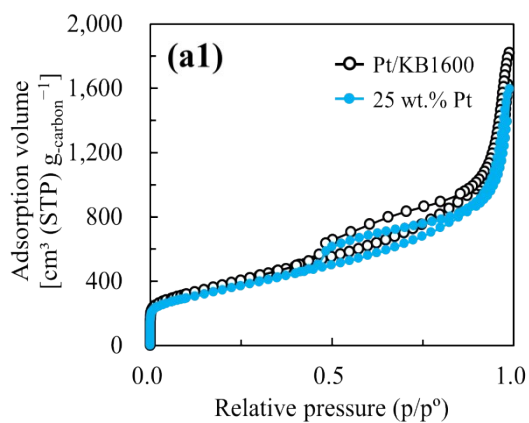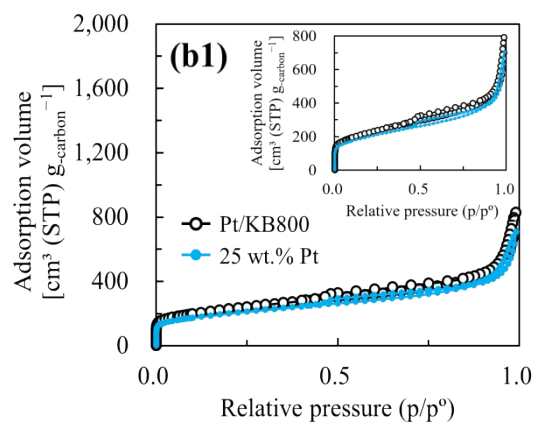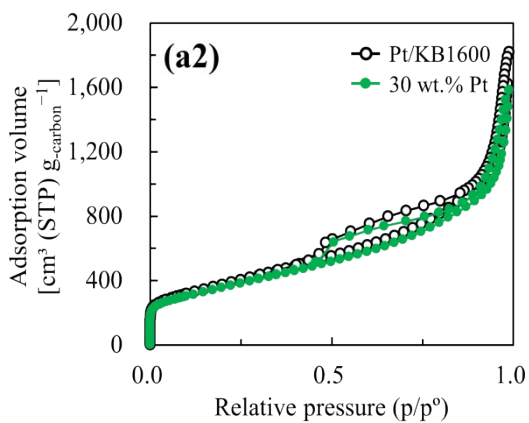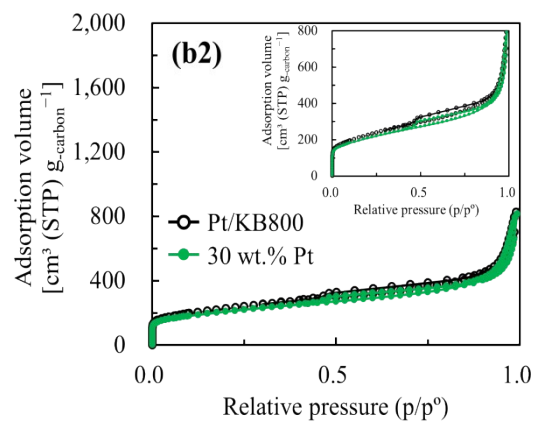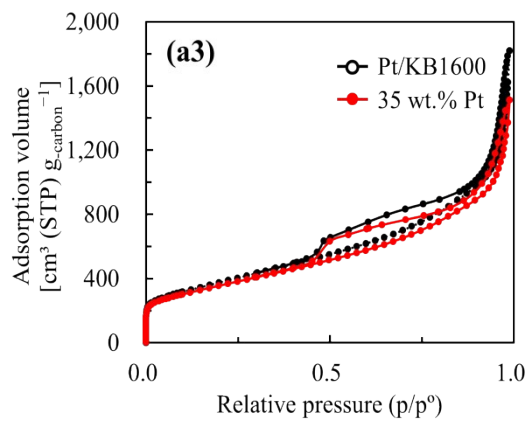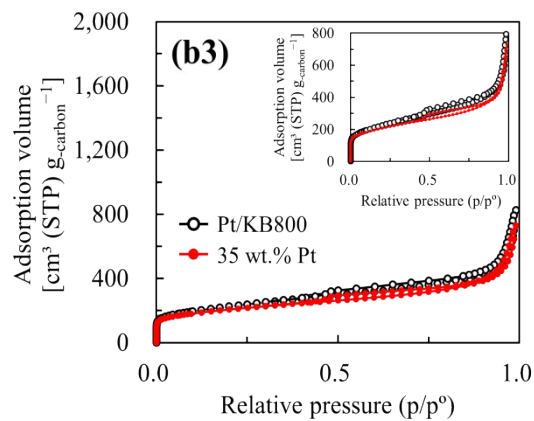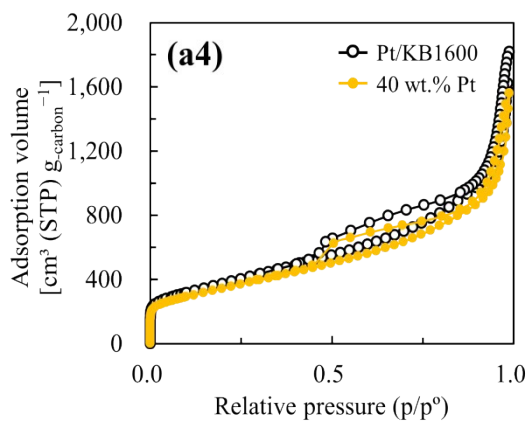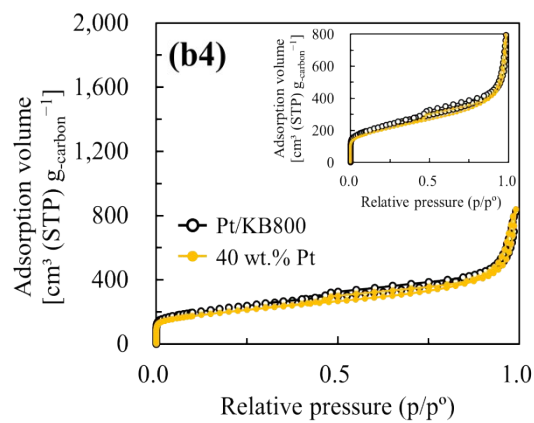

**Fig. S2** Nitrogen adsorption-desorption isotherms of two different carbon support and carbon-supported Pt catalysts (Pt/KB1600 and Pt/KB800) with different Pt loading of (a1 - a4) 25 - 40 wt.%, and (b1 - b4) 25 - 40 wt.%, respectively.

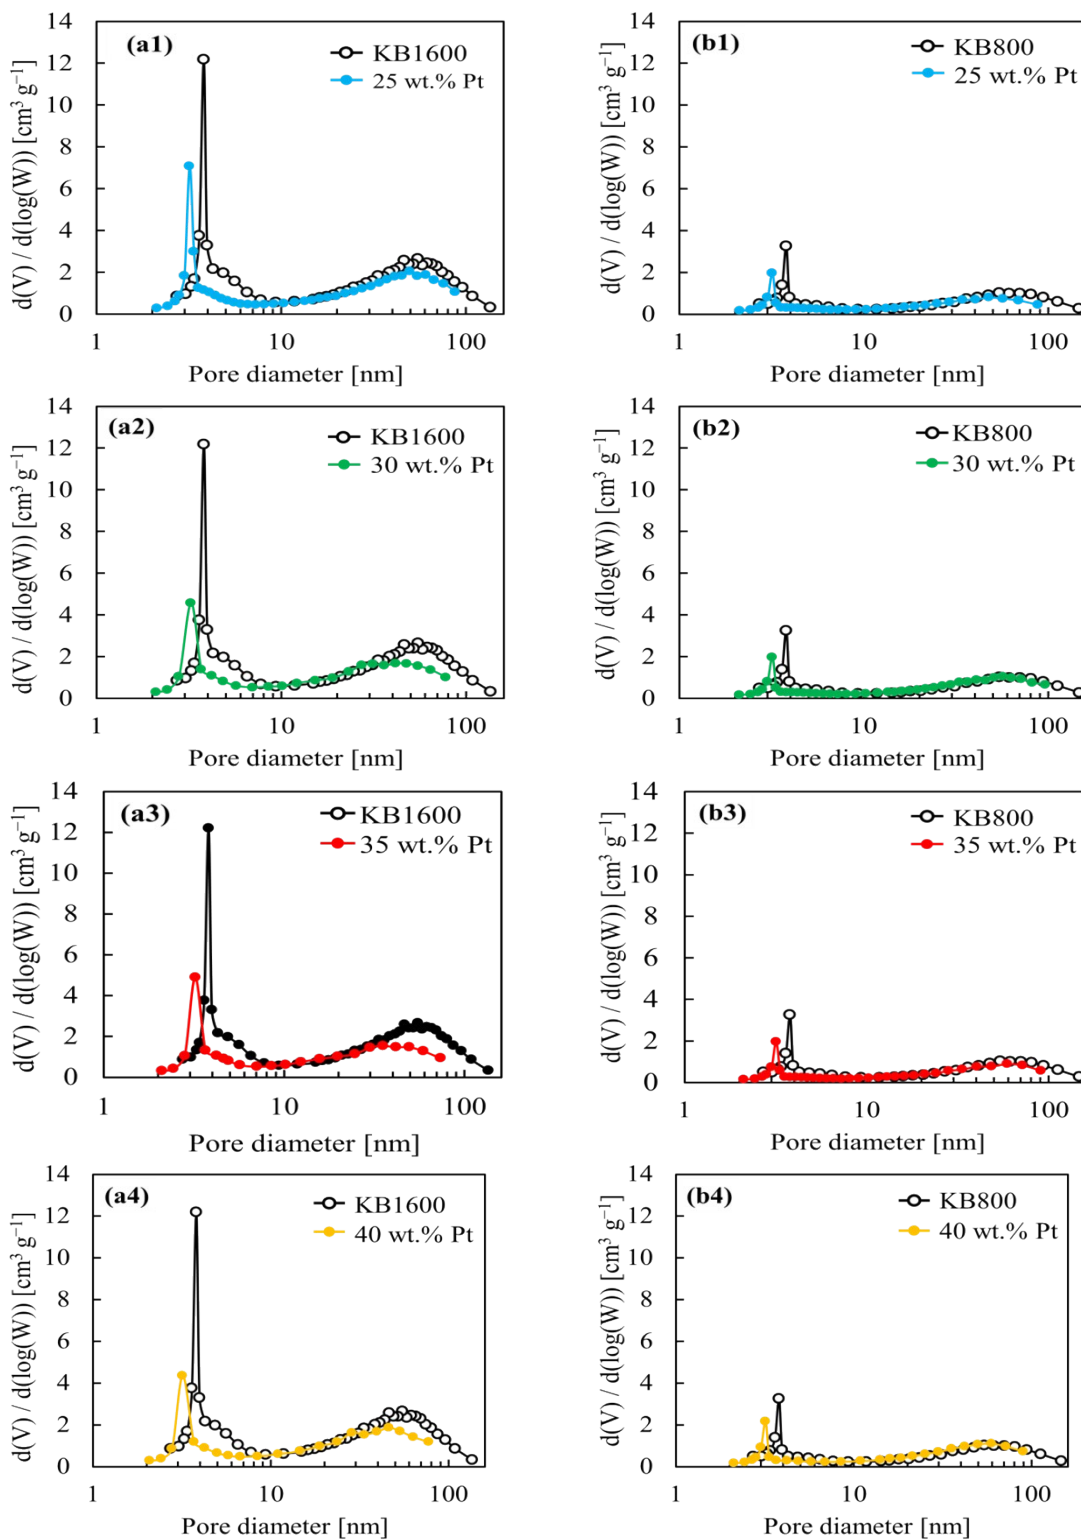

**Fig. S3** Pore size distribution of carbon supports, Pt/KB1600 and Pt/KB800 catalyst with Pt loadings of (a1 - a4) 25 - 40 wt.%, and (b1 - b4) 25 - 40 wt.%, respectively.

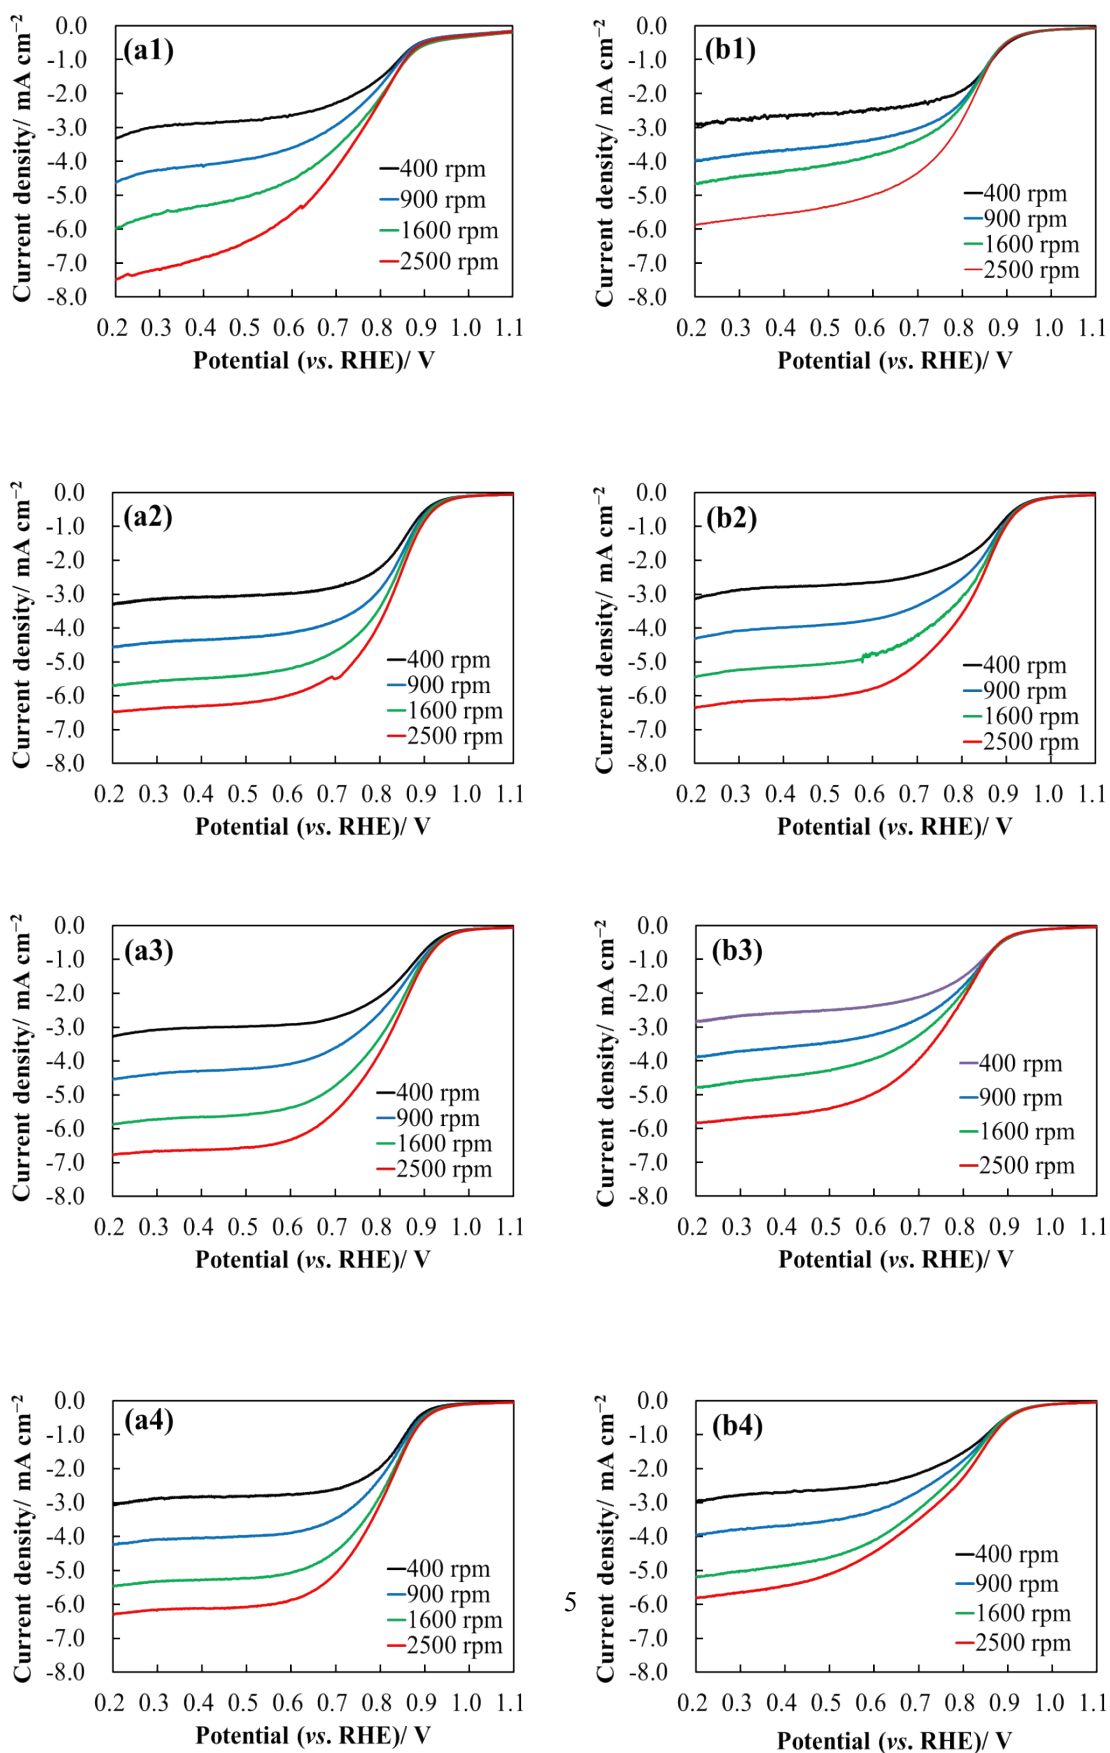

**Fig. S4** ORR polarization curves of (a1) 25 wt.% Pt/KB1600, (a2) 30 wt.% Pt/KB1600, (a3) 35 wt.% Pt/KB1600, (a4) 40 wt.% Pt/KB1600, (b1) 25 wt.% Pt/KB800, (b2) 30 wt.% Pt/KB800, (b3) 35 wt.% Pt/KB800, and (b4) 40 wt.% Pt/KB800 catalyst recorded at RT in 0.1 M HClO<sub>4</sub> solution.

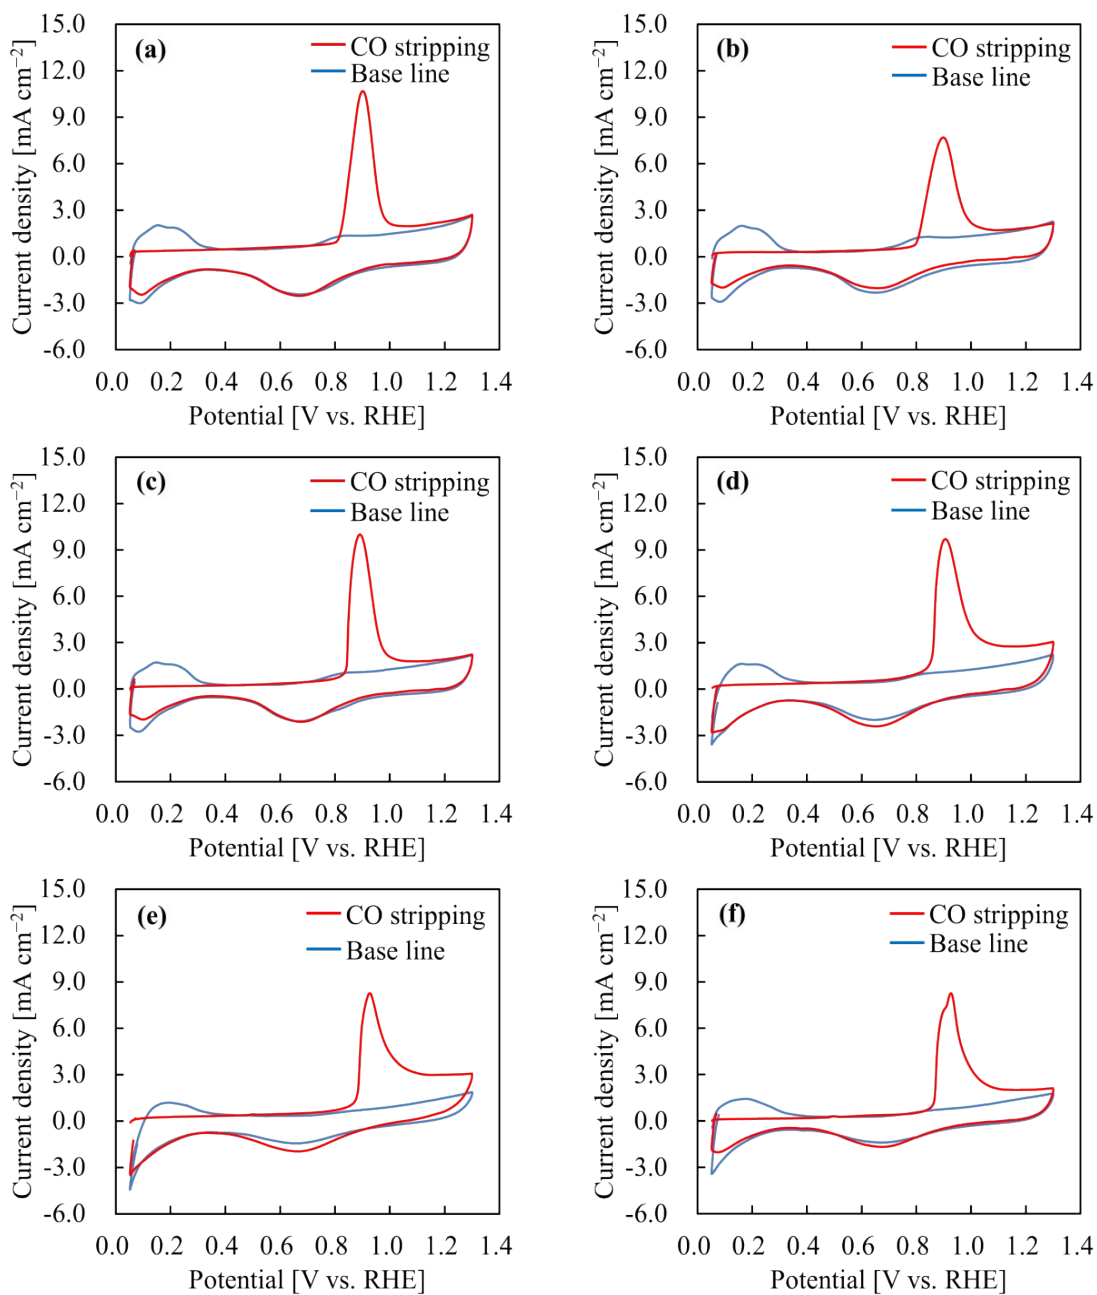

**Fig. S5** CO stripping voltammograms for (a) 25wt.% Pt/KB1600, (b) 30wt.% Pt/KB1600, (c) 40wt.% Pt/KB1600, (d) 25wt.% Pt/KB800, (e) 35wt.% Pt/KB800 and (f) 40wt.% Pt/KB800 catalyst.
